# In situ pressure modulation measurements by video capillaroscopy reveal capillary stiffening and reduced reactivity with age

Marcus L. Forst<sup>1</sup>, Gabriela Rincon<sup>2</sup>, Juliette H. Levy<sup>3</sup>,  
David N Cornfield<sup>4</sup>, Stephen R Quake<sup>1,3,5\*</sup>

<sup>1</sup>Department of Applied Physics, Stanford University, Stanford, 94305, CA, USA.

<sup>2</sup>Department of Physics, Stanford University, Stanford, 94305, CA, USA.

<sup>3</sup>Department of Bioengineering, Stanford University, Stanford, 94305, CA, USA.

<sup>4</sup>Department of Pediatrics-Pulmonary Medicine, Stanford University, Stanford, 94305, CA, USA.

<sup>5</sup>Chan Zuckerberg Initiative, Redwood City, 94063, CA, USA.

\*Corresponding author(s). E-mail(s): [steve@quake-lab.org](mailto:steve@quake-lab.org);  
Contributing authors: [mforst@stanford.edu](mailto:mforst@stanford.edu); [gr51@rice.edu](mailto:gr51@rice.edu);  
[levy3@kenyon.edu](mailto:levy3@kenyon.edu); [davidco@stanford.edu](mailto:davidco@stanford.edu);

## Abstract

Understanding tissue degradation with age and disease requires a clear picture of capillary function, but the small size of capillaries makes them difficult to model, perturb, and image. To measure capillary reactivity and stiffness, we recorded videos of nailbed capillaries while applying increasing external pressure to the finger. Combining the velocities at each pressure into participant velocity distributions showed that participants aged fifty and over (n=19) had a significantly higher median velocity than participants under fifty (n=16), whereas the effects of sex and blood pressure were insignificant. Notably, the effects of age were independent of blood pressure, suggesting that this method probes a different aspect of vascular health. Calculating dissimilarity using the earth-mover's distance between individual and population velocity distributions classified age groups above and below fifty with an AUC of  $0.79 \pm 0.07$ . These findings show that pressure-applying video capillaroscopy can measure the effects of capillary stiffening with age and interrogate how individual capillaries respond to the slowing and stopping of blood flow—suggesting that this method could be used to diagnose and evaluate vascular diseases in the future.

**Keywords:** microscopy, capillary, cardiovascular, aging, microscope, stiffening, optics, non-invasive

## 33 1 Introduction

34 The cardiovascular system operates as a feedback loop, adjusting blood flow based on  
35 body position and activity level. As people age, this system begins to break down as  
36 vessels become more stiff [1–4], causing downstream degenerative neurological  
37 diseases [5, 6], hypertension [7], heart attacks, and strokes [8]. Current vascular health  
38 assessments ranging from non-invasive blood pressure measurements to invasive  
39 cardiac catheterization [9–17] evaluate heart, artery, and vein function, but overlook  
40 capillaries because of their difficulty to image and model. Capillary images have long  
41 been used to classify Raynaud’s Syndrome [18]—a common disorder of poor capillary  
42 circulation—but their use has been confined to morphological dermatology assessment.  
43 But, recent studies in age-related diseases—such as systemic sclerosis[19, 20],  
44 diabetes[21, 22], chronic kidney disease [23, 24], and hypertension [25]—have found  
45 that capillary damage and dysfunction precede systemic symptoms. This suggests that  
46 capillary assessments may enable early detection and intervention for vascular diseases.  
47 Recent advances in camera and computer vision technology have enabled high  
48 spatiotemporal-resolution videos of capillary blood flow, known as ‘video  
49 capillaroscopy.’ This technique shows promise in detecting neutropenia in nailbed  
50 capillaries[26], classifying white blood cell types in ventral tongue capillaries[27],  
51 identifying rolling inflammatory white blood cells in human oral mucosa capillaries [28],  
52 and measuring pulse-wave propagation in retinal capillaries[29]. This work seeks to use  
53 video capillaroscopy to extend the extensive research on systemic vascular aging;  
54 evaluating healthy adults of many ages and identifying changes in stiffness and vascular  
55 reactivity. We present ‘pressure-applying video capillaroscopy,’ a non-invasive method to  
56 measure the response of nailbed capillaries to external pressure. By squeezing the finger  
57 with increasing pressure against a coverslip using an inflatable ‘finger lock,’ we  
58 progressively slow down and eventually stop blood flow. Using video-analysis software,  
59 we quantify when blood flow slows, stops, and returns in a diverse population of healthy  
60 adults (n=35, 17 male, 18 female) and identify changes in capillary function and  
61 reactivity with age. Our results establish the groundwork for a non-invasive diagnostic  
62 test with early detection potential for vascular conditions and diseases.

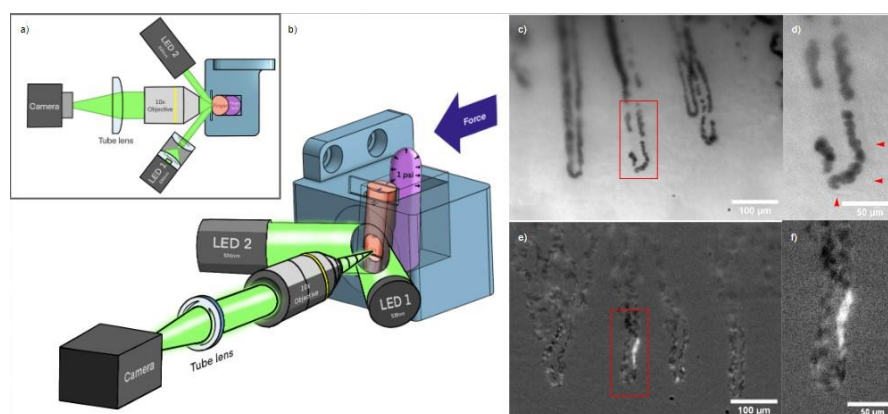

63  
64 **Fig. 1 An optical microscope to resolve nailbed capillary blood cells and apply external pressure to**  
65 **the finger:** a-b) Top-down diagram and drawing of microscope. Dual 530 nm LEDs illuminate a  
66 participant’s finger with collimated light at an oblique angle to minimize reflections. The finger is held

67 against a glass slide with constant force by a balloon (the 'finger lock') inflated to a specific pressure. This  
68 stabilizes the video and controls the flow speed. A 10x infinity corrected objective sends light to a 2" tube  
69 lens, which focuses the image on the camera. c) Sample frame showing capillaries at high pressure (1.6  
70 psi) and slow flow. d) Inset showing distinct red-blood cells and faint outline of capillary wall (red  
71 triangles). For video, see supplemental information. e) Background-subtracted image showing red-blood  
72 cell borders and a white-blood cell gap. f) Inset showing white-blood cell gap.

## 73 2 Results

### 74 2.1 Procedure

75 We enrolled 35 healthy participants across ages (16 under fifty and 19 above fifty) and  
76 sex (17 male and 18 female) (Table 1). Participants carried out their normal routines  
77 before their visit. At the beginning of the visit, participants rinsed their hands under  
78 35.5C water for one minute to normalize hand temperature for different seasons and  
79 people. To assess the response of capillaries to compressive force, we recorded videos of  
80 nailbed capillary blood flow using a custom-built capillary microscope (Fig. 1 a-b;  
81 Methods) which applies external pressure to the finger using an inflatable nitrile glove.  
82 We increased pressure every 10.49 seconds from 0.2 psi to 1.2 psi in 0.2 psi steps–  
83 gradually slowing blood flow–before reducing the pressure from 1.2 psi to 0.2 psi in the  
84 same manner. We then measured the participant's blood pressure and repeated the  
85 procedure imaging a different set of capillaries in the same or a different finger  
86 (Methods).

87 Participant videos were grouped by location on the nailbed and stabilized,  
88 sharpened, and segmented to identify and label individual capillaries (Fig 2 a; Methods).  
89 For each capillary, we plotted capillary centerline pixel intensity values with respect to  
90 time, creating kymographs in which blood flow is represented by intensity clumps  
91 moving diagonally rightward (Fig. 2 b-c); the slopes of the diagonals (Methods)  
92 correspond to the average velocity of blood flow.

93 **Table 1** Participant Demographics and Characteristics

| Group               | Total Participants (Mean Age ± SD) | BP < 120 sys | BP ≥ 120 sys |
|---------------------|------------------------------------|--------------|--------------|
| Total               | 35 (46.1 ± 21.4)                   | 20 (57%)     | 15 (43%)     |
| Under Fifty         | 16 (25.2 ± 5.8)                    | 10 (62%)     | 6 (38%)      |
| Above Fifty         | 19 (63.8 ± 10.9)                   | 10 (53%)     | 9 (47%)      |
| Male Participants   | 17 (45.4 ± 24.1)                   | 8 (47%)      | 9 (53%)      |
| Female Participants | 18 (46.9 ± 19.2)                   | 12 (67%)     | 6 (33%)      |

### 94 2.2 Analysis

95 To compare velocities in the same capillary at increasing and decreasing externally  
96 applied pressure, we matched capillaries from the same location across different videos  
97 and plotted them with respect to pressure. Because some capillaries evacuate—lose all  
98 their blood—or defocus at higher pressures, we selected one capillary per location to  
99 serve as the "representative capillary" for single-capillary tracking. Single-capillary  
100 tracking showed differences in participant response with some participants requiring  
101 much lower external pressures to slow down and stop blood flow. For example,

102 Participant Eighteen's blood flow dropped from 1500  $\mu\text{m/s}$  to 0  $\mu\text{m/s}$  with only 0.4 psi  
103 of external pressure (Fig. 3a-d). In contrast, Participant Twenty never had their blood  
104 flow stop, even with the full 1.2 psi of external pressure (Fig. 3 i-l). As we released  
105 pressure, some participants had their blood flow return symmetrically at the same point  
106 that it stopped while others showed an increase in flow rate as it returned,  
107 overcorrecting to the restriction in flow. Other capillaries lagged, requiring much lower  
108 pressures for blood to return than they needed to stop the flow (Fig. 3 m).

109 Given this variation among individuals, we grouped participants by age, blood  
110 pressure, and sex and plotted the cumulative density functions (CDFs) of their velocity  
111 distributions to see which variables had the biggest effect size. We saw a large  
112 separation due to age, with participants under fifty having far more velocities at zero  
113 (44%) and a far lower median velocity ( $80.52 \pm 263.32 \mu\text{m/s}$ ) than participants fifty or  
114 above (18%,  $362.02 \pm 288.75 \mu\text{m/s}$ ). Because of this difference in median velocities, we  
115 conducted a two-way ANOVA analysis (Table 2) with interactions to analyze the effects  
116 of age (grouped as fifty and above and below fifty), systolic blood pressure, and sex on  
117 participant median velocity. We found age to be a significant predictor of median  
118 velocity ( $p=0.005$ ), with the fifty and above group showing a 349.6% higher median  
119 velocity ( $362.02 \pm 288.751 \mu\text{m/s}$ ) than the below fifty group ( $80.52 \pm 263.32 \mu\text{m/s}$ ) (Fig.  
120 4 a). Blood Pressure and sex had smaller ( $f=1.02$ ,  $f=2.36$ ) effects than age ( $f=9.27$ ) and  
121 were not significant predictors of median velocity ( $p=0.321$ ,  $p=0.136$ ) (Table. 2).

122 To evaluate how external pressure affected velocities in each group, we resampled  
123 our velocity data at each pressure with replacement to form 1000 bootstrap samples  
124 and calculated their median velocities with 95% confidence (Fig. 4). We quantified  
125 dissimilarity between group velocity distributions at each external pressure using the  
126 two-sample Kolmogorov-Smirnov Test, showing significantly higher velocity  
127 distributions at each external pressure for older participants (Table 3). In contrast, we  
128 did not

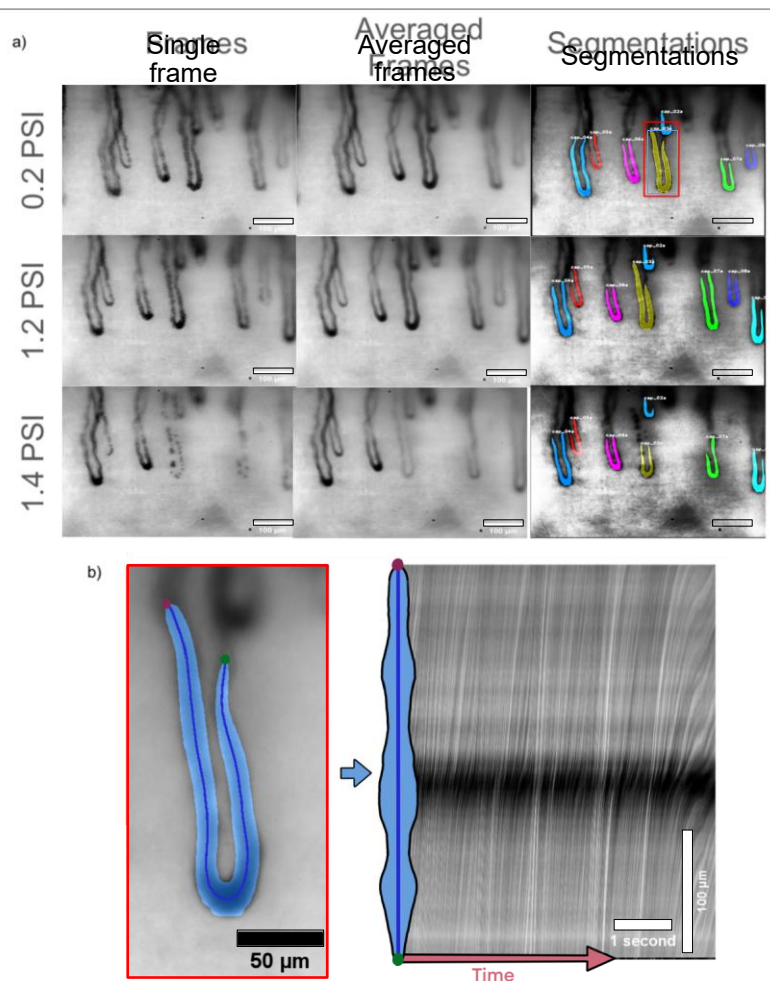

129

130 **Fig. 2 Extraction of capillary blood flow velocity from images:** a) Analysis progression at different  
131 pressures in the same participant. Registered frames are first averaged by taking the median pixel value of  
132 the stack to sharpen capillaries for segmentation. Median images are automatically segmented by *hasty.ai*  
133 before capillaries from different videos at different pressures are matched and labeled. Scale bars are 100  
134  $\mu\text{m}$ . b) A centerline is calculated for each segmented capillary. c) The pixels from that centerline are  
135 plotted for each frame, making a so-called 'kymograph' showing blood-packet trajectories over time  
136 where the x-axis is time and the y-axis is position on the capillary centerline. The white line on the  
137 kymograph shows the calculated average velocity.

138 see significant differences in velocities between normal and high blood pressure at any  
139 external pressure (Fig. 4 d, Table 3). We saw mild separation at low and high external  
140 pressures, with women having significantly higher velocities at low external pressures  
141 (0.2psi, 0.4psi) and lower velocities at the highest external pressure, 1.2psi (Fig. 4 e,  
142 Table 3).

143 Because velocities under 1000  $\mu\text{m/s}$  best-differentiated age groups, we used a  
144 windowed 'earth-movers distance' (Methods) to calculate an 'age-score,' comparing a



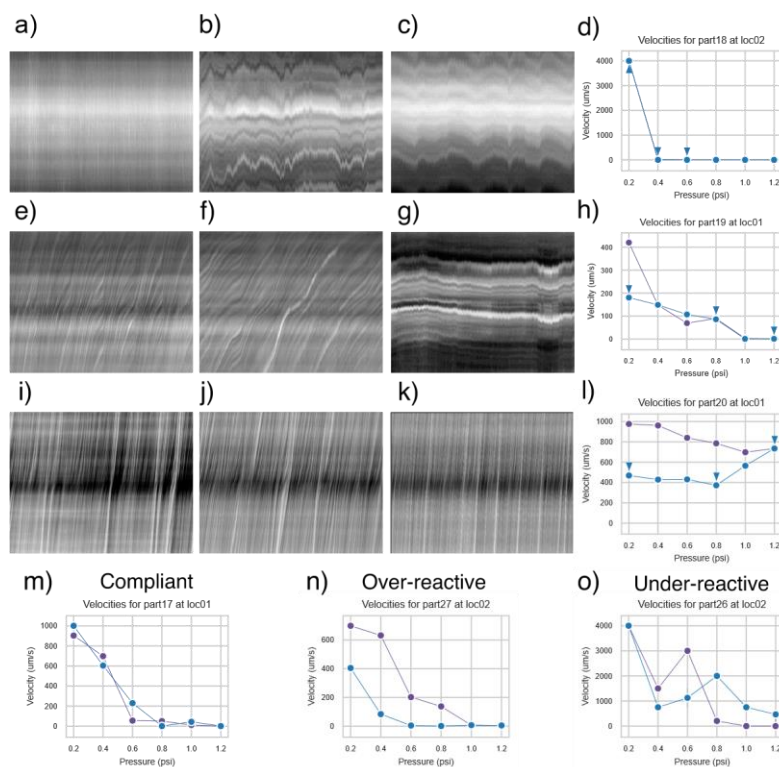

145

146 **Fig. 3 Capillary blood flow at different pressures shows varied responses of participant capillaries**  
 147 **to external pressure:** a-c) Kymographs from one participant at different pressures, showing very fast  
 148 blood flow velocity at 0.2 psi before dropping to zero at 0.4 psi; the velocity remained at zero at 0.6 psi. d,  
 149 h, l, m, n, o) Plots showing average video velocity at the externally applied pressure of that video. In our  
 150 test, we increased pressure from 0.2 psi to 1.2 psi (videos marked in blue) before decreasing the pressure  
 151 from 1.2 psi down to 0.2 psi (videos marked in purple). d) Average video velocities at all pressures from  
 152 the same participant as (a-c). Velocities from (a-c) were plotted with a blue triangle above them because  
 153 they were measured during the increasing pressure ramp. e.g) Kymographs from a different participant  
 154 where flow stopped more gradually. h) Average velocities from (e-g) plotted with blue triangles above.  
 155 i-k) Kymographs from a participant whose blood flow never stops and increases continuously after reaching a  
 156 minimum value at 0.8psi as pressure is added and then released. This shows reactive hyperemia, where  
 157 an occlusion causes the body to overreact and vasodilate. l) Average video velocities during the pressure  
 158 ramp from(i-k) plotted with blue triangle above. m-o) Average video velocity plots showing symmetric  
 159 (m), overresponsive/hyperemic (n), and laggy capillary responses (o) from different participants.

160 participant's vasculature to the average of the full group (Fig. 5 a). Plotting age-scores  
 161 with respect to age showed negative age-scores for older participants with four outliers  
 162 (Fig. 5 b), including two participants with low systolic blood pressures (99, 100). Using  
 163 age-score as a threshold to classify participants into young (<50) and old ( $\geq 50$ ) age  
 164 groups gave a receiver operating characteristic (ROC) with an Area Under the Curve  
 165 (AUC) of  $0.79 \pm 0.07$  with 95% confidence interval of [0.64, 0.94] (Fig 5 c). Using the  
 166 median velocity of each participant at 1.2 psi as a threshold gave a ROC with a similar  
 167 AUC of  $0.75 \pm 0.09$  with a confidence interval of [0.58, 0.92] (Fig. 5 d).

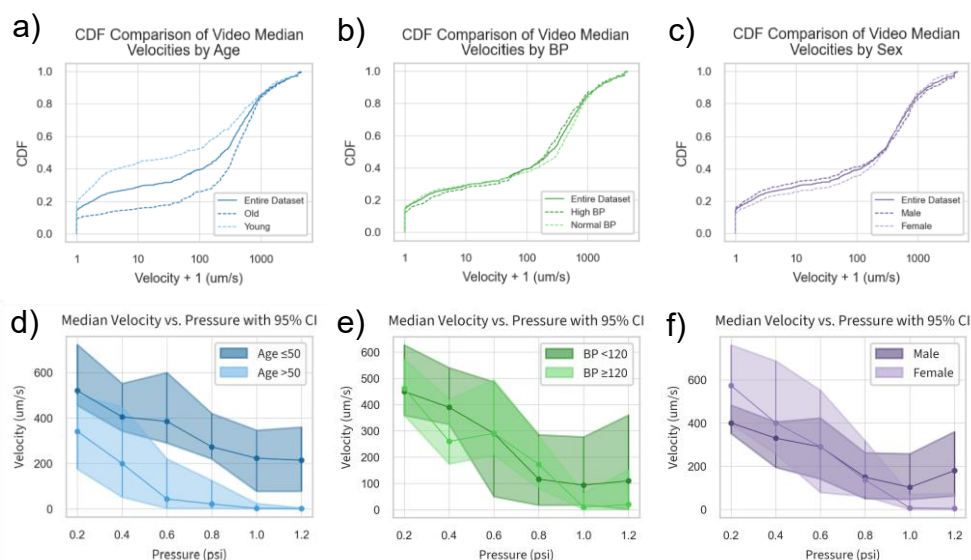

168

169 **Fig. 4 Group blood flow distributions show higher velocities for older participants with mild**  
170 **influence from blood pressure and sex:** a) Cumulative Density Function (CDF) plots of age-group blood  
171 flow velocity distributions. Participants aged fifty and over had significantly higher median blood flow  
172 (ANOVA p-value 0.005). b) CDF plots of blood-pressure-group blood flow velocity distributions. The  
173 difference between the low (<120 mm Hg) and high (≥120 mm HG) groups was not significant (ANOVA p-  
174 value 0.32). c) CDF plots of sex-group blood flow velocity distributions. The difference between sexes was  
175 not significant (ANOVA p-value 0.13). d-f) Group 95% median velocity and confidence intervals at each  
176 external pressure were calculated by bootstrapping the median of group velocities. P-values for  
177 distribution dissimilarity were calculated using the KS Statistic. d) Age groups show large separation in  
178 velocity distributions at each external pressure (table 3). e) Blood pressure groups show consistent  
179 overlap at each pressure. f) Sex groups show mild separation at low and high external pressures, with  
180 women having significantly higher velocities at low pressures and lower velocities at higher pressures.

### 181 3 Discussion

182 Here we demonstrate the ability of our custom-built capillary microscope to  
183 systematically slow and measure blood velocities in healthy participants of different  
184 ages. Individual participants varied in their response to external pressure, with some  
185 participants having blood flow stop and return symmetrically at the same pressure and  
186 others showing a hysteresis—either overcorrecting with blood returning too fast or  
187 under-correcting with blood returning at a pressure much lower than that which  
188 originally stopped flow. An increase in blood flow after occlusion—a reactive  
189 hyperemia—is commonly seen in systemic arteries and veins [1, 3, 30] and indicates a  
190 responsive but imperfectly elastic vascular system. A slow return of blood flow—  
191 impaired reactive hyperemia—suggests endothelial dysfunction, which could result  
192 from imbalanced nitric oxide levels or poor vasodilation. We measured a significant  
193 increase in the median velocities of participants over 50. This increase in blood flow  
194 velocity may

195

196 **Table 2** ANOVA results showing the effects of sex, age, and systolic blood  
197 pressure on median participant velocity.

| Factor        | Sum of Squares | df   | F-Value  | P-Value  |
|---------------|----------------|------|----------|----------|
| C(Sex)        | 1.753910e+05   | 1.0  | 2.360393 | 0.135675 |
| Age           | 6.886554e+05   | 1.0  | 9.267850 | 0.005033 |
| Age:C(Sex)    | 2.309396e+04   | 1.0  | 0.310796 | 0.581622 |
| SYS BP        | 7.570373e+04   | 1.0  | 1.018813 | 0.321444 |
| C(Sex):SYS BP | 2.303325e+04   | 1.0  | 0.309979 | 0.582116 |
| Age:SYS BP    | 1.015262e+05   | 1.0  | 1.366328 | 0.252299 |
| Residual      | 2.080564e+06   | 28.0 | -        | -        |

198  
199 **Table 3** Kolmogorov-Smirnov (KS) test for velocity distribution dissimilarity at increasing external  
200 pressures

| Age            |              |         | SYS -BP        |              |         | Sex            |              |         |
|----------------|--------------|---------|----------------|--------------|---------|----------------|--------------|---------|
| Pressure (psi) | KS Statistic | p-value | Pressure (psi) | KS Statistic | p-value | Pressure (psi) | KS Statistic | p-value |
| 0.2            | 0.329        | 0.00018 | 0.2            | 0.067        | 0.98614 | 0.2            | 0.209        | 0.04623 |
| 0.4            | 0.315        | 0.00056 | 0.4            | 0.150        | 0.31562 | 0.4            | 0.228        | 0.02666 |
| 0.6            | 0.329        | 0.00030 | 0.6            | 0.149        | 0.33106 | 0.6            | 0.126        | 0.51372 |
| 0.8            | 0.329        | 0.00043 | 0.8            | 0.193        | 0.11368 | 0.8            | 0.092        | 0.87087 |
| 1.0            | 0.341        | 0.00020 | 1.0            | 0.215        | 0.05774 | 1.0            | 0.208        | 0.06572 |
| 1.2            | 0.441        | 0.00004 | 1.2            | 0.227        | 0.11361 | 1.2            | 0.267        | 0.03673 |

201  
202  
203 stem from previously observed age-related changes in vasculature, such as endothelial  
204 cell stiffening[2–4], reduced vascular reactivity [1], or decreasing capillary density [31–  
205 34]. Taken together, our instrument is a non-invasive technique to measure age effects in  
206 capillaries. Because capillaries show damage and dysfunction before systemic  
207 symptoms in various diseases[19–25], we anticipate that this approach will enable early  
208 detection of such diseases—motivating future studies in disease diagnosis, monitoring  
209 medicine compliance, and continuous tracking of circulatory health.

## 210 4 Methods

### 211 4.1 Capillary Microscope

212 To visualize flow dynamics at 8.418x magnification and 227.8 frames per second (fps) in  
213 human nailbed capillaries, we built a custom tabletop microscope using a 10x infinity  
214 corrected objective, a 150 mm achromatic tube lens, and a 227.8 fps Basler Camera (Fig.  
215 1a-b). We illuminated the finger with two collimated beams of maximally defocused  
216 light from 530 nm green Thorlabs LEDs in the Kohler configuration (Fig. 1a-b). The  
217 beams intersected the finger at 30° angles with the nailbed to avoid surface reflections  
218 into the camera. We resolved 1951 USAF target lines up to Section 9 subsection 3, giving  
219 us a resolution of at least 645.1 lpm (Supp. Fig. 9). To reduce finger shaking, we 3D  
220 printed a custom fingerholder chamber and inflated a non-latex glove as a "finger-lock"



221 to hold the finger against a No. 2 (0.19–0.20 mm thick) glass coverslip with constant  
222 pressure, between 0.2 and 2.0 psi.

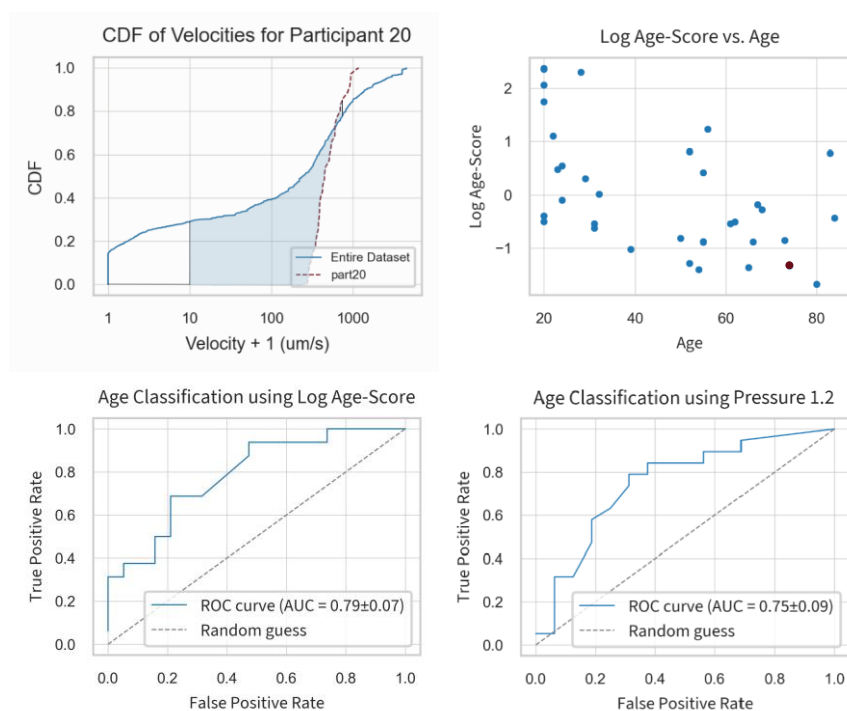

223

224 **Fig. 5 Participant similarity to the population mean, 'Age-score,' predicts vascular age:**

225 a) 'Age-score': a windowed (10-750 um/s) earth mover's distance to compare participant velocity  
226 distributions to the average velocity distribution. The participant distribution is in orange and the  
227 population distribution is in blue. b) Participant age-scores plotted against age. The participant from part  
228 (a) is plotted in red and all other participants in blue. c) ROC curve for Log Age-score. d) ROC curve for Log  
229 Median Velocity at 1.2 psi.

## 230 4.2 Pressure Ramp

231 For each participant, we took videos of nailed capillaries at 6 different external  
232 pressures. Each video was 625 frames, taken at 113.9 fps. After the video was taken,  
233 there was a 5-second delay while the camera buffered. During this time, we increased  
234 the pressure by 0.2 psi and refocused the camera to record when the camera finished  
235 buffering. Hence, we took a 5.49-second video every 10.49 total seconds. The pressure  
236 in the inflatable finger-lock was controlled using an Enfield TR-010-v-ex pressure  
237 regulator.

## 238 4.3 Finger Location Selection

239 We primarily used the ring and pinky fingers for videos because their capillaries are  
240 closer to the surface, giving better images. We looked for locations near the cuticle  
241 where multiple capillaries were exposed and flowing. Specifically, we used capillaries at  
242 the top of the cuticle, where the finger presses on the glass slide. Once we found a  
243 flowing capillary, we took a series of videos, choosing one capillary to focus on as we  
244 increased the pressure. We adjusted the field of view to keep the chosen capillary in

245 frame. We would select the second location based on the following trends: Ring fingers  
246 had larger but deeper capillaries than pinky fingers. If our first location had big  
247 capillaries that were too deep, we would check the pinky to see if we could trade size for  
248 clarity. If ring finger capillaries were too small, we would try the pointer and then  
249 middle fingers for bigger capillaries. Most often, the ring finger was the best choice.

#### 250 **4.4 Data Pipeline**

251 Participant videos were grouped by finger location and analyzed to extract velocity data  
252 of individual capillaries. To sharpen capillary edges for segmentation, we averaged  
253 frames by taking the median of video stacks stabilized using the "MOCO" ImageJ plugin  
254 [35] with a downsample value of 2 (Fig 2 a). We checked each video to ensure the videos  
255 were stable and sliced videos if a portion of the video was out of focus or incorrectly  
256 stabilized.

#### 257 **4.5 Segmentation**

258 We segmented capillaries using a custom-trained "hasty.ai" [36] neural net, editing  
259 segmentations to remove loops and overlapping capillaries (Supplementary Fig 7).

#### 260 **4.6 Centerlines**

261 To calculate the centerline of our capillary segmentations, we used the FilFinder  
262 skeletonize algorithm [37] and pruned centerlines with a branch threshold of 40 pixels  
263 (16.4  $\mu\text{m}$ ), a minimum capillary length of 50 pixels (20.5  $\mu\text{m}$ ), and a prune criterion of  
264 'length'. For the pruning to work correctly, we required segmentations without loops.

#### 265 **4.7 Kymographs**

266 To make kymographs, we averaged centerline values using a 4-pixel-radius (1.64  $\mu\text{m}$ )  
267 circular kernel (Supplementary Fig 6) and plotted them with respect to time. We  
268 removed horizontal banding from an image by subtracting a smoothed version of the  
269 row means from the image. We obtained lines representing blood packet trajectories  
270 from kymograph images by applying a sigma 2 Gaussian blur to the image, using Canny  
271 edge detection, and applying the Hough Transform to find lines. We calculated velocities  
272 by measuring the average of the slopes of these lines, weighted by the length of the line.

273 We validated velocities using a custom-made graphical user interface (GUI), which  
274 plots the called velocity on top of the kymograph (Supplement Fig 8). We would then  
275 manually determine if the velocity was: Correct (T/F), zero/horizontal (T/F), 'too slow',  
276 or 'too fast. If the velocity call was correct, we retained the called value. If incorrect but  
277 the kymograph showed horizontal lines (zero flow), we marked the "Corrected Velocity"  
278 as zero. Otherwise, we classified the velocity as "too fast" or "too slow." We then  
279 manually annotated these 'too fast' and 'too slow' velocities by overlaying the following  
280 velocities- 20, 35, 50, 75, 110, 160, 220, 290, 360, 420, 500, 600, 750, 1000, 1500, 2000,  
281 3000, 4000  $\mu\text{m/s}$ -onto the image and choosing the correct slope.

## 282 **4.8 Median Velocities**

283 To normalize for unequal numbers of capillaries in each video when comparing  
284 participants, we calculated the median velocity across distinct capillaries for each video.  
285 The median of these medians is the median participant velocity. We used medians  
286 instead of means because high-velocity values had a larger uncertainty than smaller  
287 values.

## 288 **4.9 Cumulative Density Functions**

289 Cumulative density functions (CDFs) were made using the participant's median video  
290 velocity (seen above). The farther the distribution line is shifted to the right, the faster  
291 the distribution of velocities.

## 292 **4.10 Windowed Earth Mover's Distance**

293 The earth mover's distance (EMD) is a measure of dissimilarity between distributions  
294 defined as the difference in area of two cumulative distribution function (CDF) curves.  
295 We used a windowed EMD to measure the difference in area under the curve for the  
296 velocities from 10  $\mu\text{m/s}$  to 750  $\mu\text{m/s}$ . We chose this because velocities higher than 750  
297  $\mu\text{m/s}$  had higher uncertainty but could be binned together into a "higher than 750  
298  $\mu\text{m/s}$ " bucket. Similarly, values at or below 10  $\mu\text{m/s}$  had very similar kymographs and  
299 made up a large percentage of velocities. We treated them as the same in this method.

## 300 **Declarations**

### 301 **Funding**

- 302 • Knight-Hennessy Scholars Program
- 303 • NSF GRFP Scholarship
- 304 • CZI Biohub grant: 1197775-1GWMUM

### 305 **Ethical approval**

- 306 1. Approval: All experimental methods were approved by Stanford institutional review  
307 board (IRB) 6 in protocol number 64537.
- 308 2. Accordance: All methods were carried out as written in the IRB protocol 64537.
- 309 3. Informed consent: Informed consent was obtained from all participants.

### 310 **Code availability**

311 All code is available at: <https://github.com/gt8mar/capillary-flow>

### 312 **Author contribution**

313 M.L.F and S.R.Q. conceptualized the study. M.L.F. and S.R.Q. designed the study. M.L.F.,  
314 S.R.Q., and D.N.C. wrote the IRB protocol. G.R. wrote the capillary-naming pipeline. M.L.F.

315 wrote all other parts of the data processing and analysis pipeline. M.L.F, G.R, J.H.L, S.R.Q.,  
316 and D.R.C recruited all participants. M.L.F, G.R., and J.H.L. collected, processed, and  
317 performed quality control on all data. M.L.F. performed all analyses. M.L.F. and S.R.Q.  
318 wrote the manuscript. All authors revised the manuscript and approved it for  
319 publication.

## 320 **Corresponding author**

321 Correspondence to Stephen R. Quake.

## 322 **Supplementary information.**

323 **Acknowledgements.** We thank G.E. Marti for optics and statistics discussions. We thank  
324 J. Lee, T. Chen and S. Cofer for helpful discussions. We thank Hongquan Li for optics and  
325 software discussions. We thank K. Medill for electrical circuit input, feedback, and  
326 helpful discussions. We thank N. Kozak and A. Marsden for fluid-flow discussions.  
327 Funding: This work is supported by the Chan Zuckerberg Biohub. M.L.F. is supported by  
328 a National Science Foundation Graduate Research Fellowship, and the Knight-Hennessy  
329 Scholars Program.

## 330 **Supplementary Figures:**

331

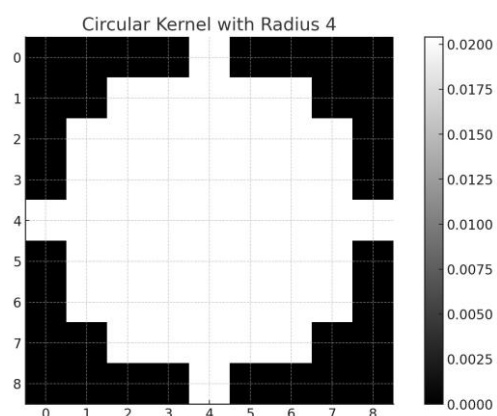

332

333 **Sup Fig. 1** Circle of pixels used to create kymographs.

334

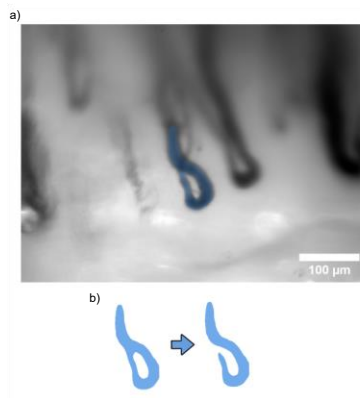

335

336 **Sup Fig. 2** Manual cleaning process to remove loops from capillary segmentations. Our analysis cannot  
337 currently prune skeletons with loops.

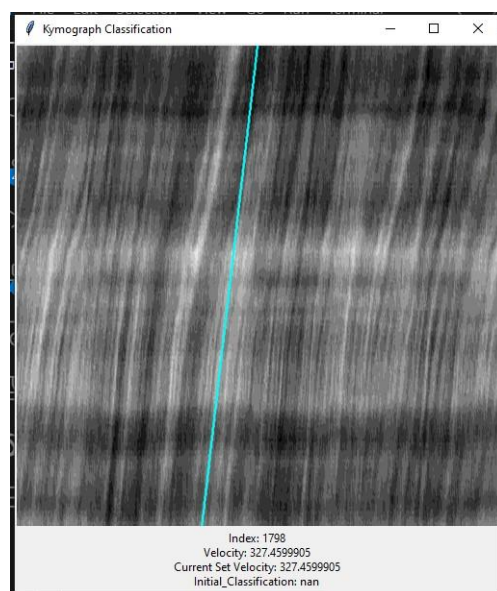

338

339 **Sup Fig. 3** The GUI we use to manually check and call velocities.



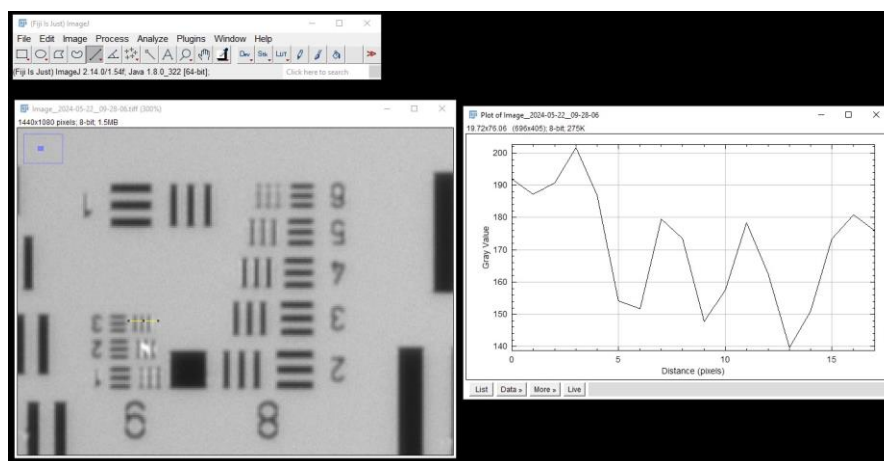

340

341 **Sup Fig. 4** USAF Resolution Target shows resolution exceeds 645.1 lpm

## 342 References

- 343 [1] Malik, A.R., Venkateswarlu Kondragunta, Kondragunta, V., Kullo, I.J.: Forearm  
344 Vascular Reactivity and Arterial Stiffness in Asymptomatic Adults From the  
345 Community. *Hypertension* **51**(6), 1512–1518 (2008) <https://doi.org/10.1161/hypertensionaha.107.106088> . MAG ID: 2067040195  
346
- 347 [2] McEniery, C.M., Yasmin, Hall, I.R., Qasem, A., Wilkinson, I.B., Cockcroft, J.R.: Normal  
348 Vascular Aging: Differential Effects on Wave Reflection and Aortic Pulse Wave  
349 Velocity: The Anglo-Cardiff Collaborative Trial (ACCT). *Journal of the American  
350 College of Cardiology* **46**(9), 1753–1760 (2005) <https://doi.org/10.1016/j.jacc.2005.07.037> . Accessed 2024-06-03  
351
- 352 [3] Wilk, G., Osmenda, G., Matusik, P., Nowakowski, D., Jasiewicz-Honkisz, B., Ignacak, A.,  
353 Czeńnikiewicz-Guzik, M., Guzik, T.J.: Endothelial function assessment in  
354 atherosclerosis: comparison of brachial artery flow-mediated vasodilation and  
355 peripheral arterial tonometry. *Polskie Archiwum Medycyny Wewnętrznej* **123**(9),  
356 443–452 (2013) <https://doi.org/10.20452/pamw.1879>
- 357 [4] Huynh, J., Nishimura, N., Rana, K., Peloquin, J.M., Califano, J.P., Montague, C.R., King,  
358 M.R., Schaffer, C.B., Reinhart-King, C.A.: Age-Related Intimal Stiffening Enhances  
359 Endothelial Permeability and Leukocyte Transmigration. *Science Translational  
360 Medicine* **3**(112), 112–122 (2011) <https://doi.org/10.1126/scitranslmed.3002761> . Publisher: American Association for the Advancement of  
361 Science. Accessed 2024-06-04  
362
- 363 [5] Kalaria, R.N.: Cerebral vessels in ageing and Alzheimer’s disease. *Pharmacology &  
364 Therapeutics* **72**(3), 193–214 (1996) [https://doi.org/10.1016/S0163-7258\(96\)00116-7](https://doi.org/10.1016/S0163-7258(96)00116-7) . Accessed 2024-06-04  
365

- 366 [6] Mogi, M.: Could Management of Blood Pressure Prevent Dementia in the elderly?  
367 Clinical Hypertension **25**(1), 27 (2019) [https://doi.org/10.1186/s40885-019-](https://doi.org/10.1186/s40885-019-0135-7)  
368 [0135-7](https://doi.org/10.1186/s40885-019-0135-7) . Accessed 2024-06-04
- 369 [7] Guzik, T.J., Touyz, R.M.: Oxidative Stress, Inflammation, and Vascular Aging in  
370 Hypertension. Hypertension **70**(4), 660–667 (2017) [https://doi.org/10.1161/](https://doi.org/10.1161/HYPERTENSIONAHA.117.07802)  
371 [HYPERTENSIONAHA.117.07802](https://doi.org/10.1161/HYPERTENSIONAHA.117.07802) . Publisher: American Heart Association. Accessed  
372 2024-06-03
- 373 [8] Mattace-Raso, F.U.S., Cammen, T.J.M., Hofman, A., Popele, N.M., Bos, M.L., Schalekamp,  
374 M.A.D.H., Asmar, R., Reneman, R.S., Hoeks, A.P.G., Breteler, M.M.B., Witteman, J.C.M.:  
375 Arterial Stiffness and Risk of Coronary Heart Disease and Stroke. Circulation **113**(5),  
376 657–663 (2006) <https://doi.org/10.1161/CIRCULATIONAHA.105.555235> .  
377 Publisher: American Heart Association. Accessed 2024-06-21
- 378 [9] Drawz, P.E., Abdalla, M., Rahman, M.: Blood Pressure Measurement: Clinic, Home,  
379 Ambulatory, and Beyond. American Journal of Kidney Diseases **60**(3),  
380 449–462 (2012) <https://doi.org/10.1053/j.ajkd.2012.01.026> . Accessed 2024-08-31
- 381 [10] Martis, R.J., Acharya, U.R., Adeli, H.: Current methods in electrocardiogram  
382 characterization. Computers in Biology and Medicine **48**, 133–149 (2014) <https://doi.org/10.1016/j.compbiomed.2014.02.012> . Accessed 2024-08-31
- 384 [11] Latus, H., Kuehne, T., Beerbaum, P., Apitz, C., Hansmann, G., Muthurangu, V.,  
385 Moledina, S.: Cardiac MR and CT imaging in children with suspected or confirmed  
386 pulmonary hypertension/pulmonary hypertensive vascular disease. Expert  
387 consensus statement on the diagnosis and treatment of paediatric pulmonary  
388 hypertension. The European Paediatric Pulmonary Vascular Disease Network,  
389 endorsed by ISHLT and DGPK. Heart **102**(Suppl 2), 30–35 (2016) <https://doi.org/10.1136/heartjnl-2015-308246> . Publisher: BMJ Publishing Group Ltd and  
390 British Cardiovascular Society Section: Pulmonary vascular disease. Accessed 2024-  
391 08-31
- 393 [12] Lancellotti, P., Price, S., Edvardsen, T., Cosyns, B., Neskovic, A.N., Dulgheru, R.,  
394 Flachskampf, F.A., Hassager, C., Pasquet, A., Gargani, L., Galderisi, M., Cardim, N.,  
395 Haugaa, K.H., Ancion, A., Zamorano, J.-L., Donal, E., Bueno, H., Habib, G.: The use of  
396 echocardiography in acute cardiovascular care: Recommendations of the European  
397 Association of Cardiovascular Imaging and the Acute Cardiovascular Care  
398 Association. European Heart Journal - Cardiovascular Imaging **16**(2), 119–146  
399 (2015) <https://doi.org/10.1093/ehjci/jeu210> . Accessed 2024-08-31
- 400 [13] Baan, J., Jong, T.A., Kerkhof, P., Moene, R.J., Dijk, A.v., Velde, E.T.v.d., Koops, J.:  
401 Continuous stroke volume and cardiac output from intra-ventricular dimensions  
402 obtained with impedance catheter. Cardiovascular research **15** 6, 328–34  
403 (1981) <https://doi.org/10.1093/CVR/15.6.328> . Accessed 2024-08-31

- 404 [14] Diederichsen, S.Z., Haugan, K.J., Køber, L., Højberg, S., Brandes, A., Kronborg, C., Graff,  
405 C., Holst, A.G., Nielsen, J.B., Krieger, D., Svendsen, J.H.: Atrial fibrillation detected by  
406 continuous electrocardiographic monitoring using implantable loop recorder to  
407 prevent stroke in individuals at risk (the LOOP study): Rationale and design of a  
408 large randomized controlled trial. *American Heart Journal* **187**, 122–132 (2017)  
409 <https://doi.org/10.1016/j.ahj.2017.02.017> . Accessed 2024-08-31
- 410 [15] Avari Silva, J.N., Bromberg, B.I., Emge, F.K., Bowman, T.M., Van Hare, G.F.: Implantable  
411 Loop Recorder Monitoring for Refining Management of Children With Inherited  
412 Arrhythmia Syndromes. *Journal of the American Heart Association* **5**(6), 003632  
413 (2016) <https://doi.org/10.1161/JAHA.116.003632> . Publisher: Wiley. Accessed  
414 2024-08-31
- 415 [16] Franklin, D., Tzavelis, A., Lee, J.Y., Chung, H.U., Trueb, J., Arafa, H., Kwak, S.S., Huang, I.,  
416 Liu, Y., Rathod, M., Wu, J., Liu, H., Wu, C., Pandit, J.A., Ahmad, F.S., McCarthy, P.M.,  
417 Rogers, J.A.: Synchronized wearables for the detection of haemodynamic states via  
418 electrocardiography and multispectral photoplethysmography. *Nature Biomedical  
419 Engineering* **7**(10), 1229–1241 (2023) <https://doi.org/10.1038/s41551-023-01098-y> . Accessed 2024-09-06
- 421 [17] Karlas, A., Katsouli, N., Fasoula, N.-A., Bariotakis, M., Chlis, N.-K., Omar, M., He, H.,  
422 Iakovakis, D., Schaffer, C., Kallmayer, M., Fuchtenbusch, M., Ziegler, A., Eckstein, H.-  
423 H., Hadjileontiadis, L., Ntziachristos, V.: Dermal features derived from optoacoustic  
424 tomograms via machine learning correlate microangiopathy phenotypes with  
425 diabetes stage. *Nature Biomedical Engineering* **7**(12), 1667–1682 (2023)  
426 <https://doi.org/10.1038/s41551-023-01151-w> . Accessed 2024-09-06
- 427 [18] Mannarino, E., Pasqualini, L., Fedeli, F., Scricciolo, V., Innocente, S.: Nailfold  
428 Capillaroscopy in the Screening and Diagnosis of Raynaud’s Phenomenon. *Angiology*  
429 **45**(1), 37–42 (1994) <https://doi.org/10.1177/000331979404500105> . Publisher:  
430 SAGE Publications Inc. Accessed 2023-02-12
- 431 [19] Lambova, S.N., Müller-Ladner, U.: Capillaroscopic pattern in systemic sclerosis — an  
432 association with dynamics of processes of angio- and vasculogenesis. *Microvascular  
433 Research* **80**(3), 534–539 (2010) <https://doi.org/10.1016/j.mvr.2010.07.005> .  
434 Accessed 2024-06-01
- 435 [20] Trojanowska, M.: Cellular and molecular aspects of vascular dysfunction in systemic  
436 sclerosis. *Nature Reviews Rheumatology* **6**(8), 453–460 (2010) [https://doi.  
437 org/10.1038/nrrheum.2010.102](https://doi.org/10.1038/nrrheum.2010.102) . Publisher: Nature Publishing Group. Accessed  
438 2024-06-01
- 439 [21] Caballero, S., Sengupta, N., Afzal, A., Chang, K.-H., Li Calzi, S., Guberski, D.L., Kern, T.S.,  
440 Grant, M.B.: Ischemic Vascular Damage Can Be Repaired by Healthy, but Not  
441 Diabetic, Endothelial Progenitor Cells. *Diabetes* **56**(4), 960–967 (2007)  
442 <https://doi.org/10.2337/db06-1254> . Accessed 2024-06-01

- 443 [22] Jumar, A., Harazny, J.M., Ott, C., Friedrich, S., Kistner, I., Striepe, K., Schmieder, R.E.:  
444 Retinal Capillary Rarefaction in Patients with Type 2 Diabetes Mellitus. *PLOS ONE*  
445 **11**(12), 0162608 (2016) <https://doi.org/10.1371/journal.pone.0162608> .  
446 Publisher: Public Library of Science. Accessed 2024-06-01
- 447 [23] Kida, Y., Tchao, B.N., Yamaguchi, I.: Peritubular capillary rarefaction: a new  
448 therapeutic target in chronic kidney disease. *Pediatric Nephrology* **29**(3), 333–342  
449 (2014) <https://doi.org/10.1007/s00467-013-2430-y> . Accessed 2024-06-04
- 450 [24] Frost, S., Nolde, J.M., Chan, J., Joyson, A., Gregory, C., Carnagarin, R., Herat,  
451 L.Y., Matthews, V.B., Robinson, L., Vignarajan, J., Prentice, D., Kanagasingam, Y.,  
452 Schlaich, M.P.: Retinal capillary rarefaction is associated with arterial and kidney  
453 damage in hypertension. *Scientific Reports* **11**(1), 1001 (2021) [https://](https://doi.org/10.1038/s41598-020-79594-3)  
454 [doi.org/10.1038/s41598-020-79594-3](https://doi.org/10.1038/s41598-020-79594-3) . Accessed 2024-09-05
- 455 [25] Wolf, S., Arend, O., Schulte, K., Ittel, T.H., Reim, M., Reim, M.: Quantification of retinal  
456 capillary density and flow velocity in patients with essential hypertension.  
457 *Hypertension* **23**(4), 464–467 (1994) <https://doi.org/10.1161/01.hyp.23.4.464> .  
458 MAG ID: 2112685515
- 459 [26] Bourquard, A., Pablo-Trinidad, A., Butterworth, I., S´anchez-Ferro, , Cerrato,  
460 C., Humala, K., Fabra Urdiola, M., Del Rio, C., Valles, B., Tucker-Schwartz, J.M., Lee,  
461 E.S., Vakoc, B.J., Padera, T.P., Ledesma-Carbayo, M.J., Chen, Y.B., Hochberg, E.P., Gray,  
462 M.L., Castro-Gonz´alez, C.: Non-invasive detection of severe neutropenia in  
463 chemotherapy patients by optical imaging of nailfold microcirculation. *Scientific*  
464 *Reports* **8**(1), 5301 (2018) [https://doi.org/10.1038/](https://doi.org/10.1038/s41598-018-23591-0)  
465 [s41598-018-23591-0](https://doi.org/10.1038/s41598-018-23591-0) . Accessed 2020-08-24
- 466 [27] McKay, G.N., Mohan, N., Durr, N.J.: Imaging human blood cells in vivo with oblique  
467 back-illumination capillaroscopy. *Biomedical Optics Express* **11**(5), 2373– 2382  
468 (2020) <https://doi.org/10.1364/BOE.389088> . Publisher: Optical Society of  
469 America. Accessed 2020-08-25
- 470 [28] Bagramyan, A., Lin, C.P.: Miniaturized microscope for non-invasive imaging of  
471 leukocyte-endothelial interaction in human microcirculation. *Scientific Reports*  
472 **13**(1), 1–7 (2023) <https://doi.org/10.1038/s41598-023-45018-1> . Publisher:  
473 Nature Publishing Group. Accessed 2024-08-26
- 474 [29] Bedggood, P., Metha, A.: Direct measurement of pulse wave propagation in  
475 capillaries of the human retina. *Optics Letters* **46**(18), 4450–4453 (2021) [https://](https://doi.org/10.1364/OL.434454)  
476 [doi.org/10.1364/OL.434454](https://doi.org/10.1364/OL.434454) . Publisher: Optica Publishing Group. Accessed 2024-  
477 07-23
- 478 [30] Axtell, A.L., Gomari, F.A., Cooke, J.P.: Assessing Endothelial Vasodilator Function with  
479 the Endo-PAT 2000. *Journal of Visualized Experiments : JoVE* (44),  
480 2167 (2010) <https://doi.org/10.3791/2167> . Accessed 2023-01-07

- 481 [31] Serné, E.H., Gans, R.O.B., Maaten, J.C., Tangelder, G.-J., Donker, A.J.M., Stehouwer,  
482 C.D.A.: Impaired Skin Capillary Recruitment in Essential Hypertension Is Caused by  
483 Both Functional and Structural Capillary Rarefaction. *Hypertension* **38**(2), 238–242  
484 (2001) <https://doi.org/10.1161/01.HYP.38.2.238> . Publisher: American Heart  
485 Association. Accessed 2024-06-03
- 486 [32] Russell, J.A., Kindig, C.A., Behnke, B.J., Poole, D.C., Musch, T.I.: Effects of aging on  
487 capillary geometry and hemodynamics in rat spinotrapezius muscle. *American*  
488 *Journal of Physiology-Heart and Circulatory Physiology* **285**(1), 251– 258 (2003)  
489 <https://doi.org/10.1152/ajpheart.01086.2002> . Publisher: American Physiological  
490 Society. Accessed 2024-06-03
- 491 [33] Kitahara, S., Desaki, J., Yoshii, A., Matsui, A., Morikawa, S., Ezaki, T.: Electron  
492 microscopic study of capillary network remodeling in the extensor digitorum longus  
493 muscle of normal adult rat. *Microscopy* **65**(6), 508–516 (2016) <https://doi.org/10.1093/jmicro/dfw040> . Accessed 2024-06-04
- 495 [34] Zhou, Q., Glu“ck, C., Tang, L., Glandorf, L., Droux, J., El Amki, M., Wegener, S., Weber, B.,  
496 Razansky, D., Chen, Z.: Cortex-wide transcranial localization microscopy with  
497 fluorescently labeled red blood cells. *Nature Communications* **15**(1), 3526 (2024)  
498 <https://doi.org/10.1038/s41467-024-47892-3> . Publisher: Nature Publishing  
499 Group. Accessed 2024-05-02
- 500 [35] Dubbs, A., Guevara, J., Yuste, R.: moco: Fast Motion Correction for Calcium Imaging.  
501 *Frontiers in Neuroinformatics* **10**(6) (2016). Accessed 2022-10-27
- 502 [36] Hasty - Image Annotation Platform
- 503 [37] Koch, E.W., Rosolowsky, E.W.: Filament identification through mathematical  
504 morphology. *Monthly Notices of the Royal Astronomical Society* **452**(4), 3435– 3450  
505 (2015) <https://doi.org/10.1093/mnras/stv1521> . Accessed 2024-09-05
